# Supplementary material for: Electrospraying as a Technique for the Controlled Synthesis of Biocompatible PLGA@Ag2S and PLGA@Ag2S@SPION Nanocarriers with Drug Release Capability
Source: MDPI journal article supplement (doi:10.3390/pharmaceutics14010214), 2022-01-17
Supplement: s1 [file s1]

# Supplementary Materials: Electrospraying as technique for the controlled synthesis of biocompatible PLGA@Ag<sub>2</sub>S and PLGA@Ag<sub>2</sub>S@SPION nanocarriers with drug release capability

Alexis Alvear-Jiménez, Irene Zabala-Gutierrez, Yingli Shen, Gonzalo Villaverde, Laura Lozano Chamizo, Pablo Guardia, Miguel Tinoco, Beatriz Garcia-Pinel, José Prados, Consolación Melguizo, Manuel Ló-pezz-Romero, Daniel Jaque, Marco Filice, Rafael Contreras-Cáceres

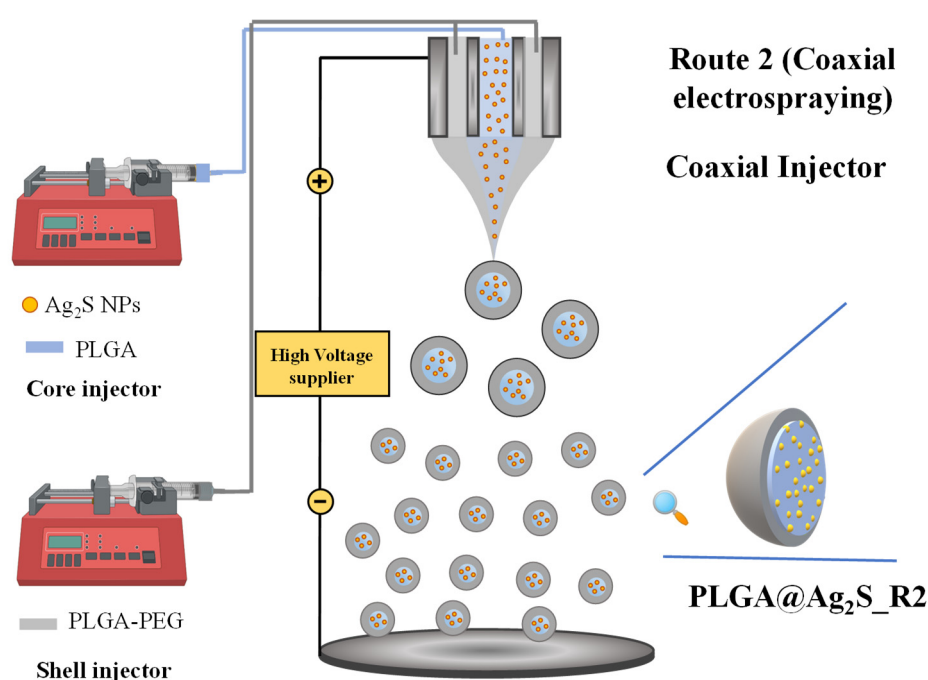

**Scheme S1.** Schematic representation for the synthesis of PLGA@Ag<sub>2</sub>S\_R2 NPs

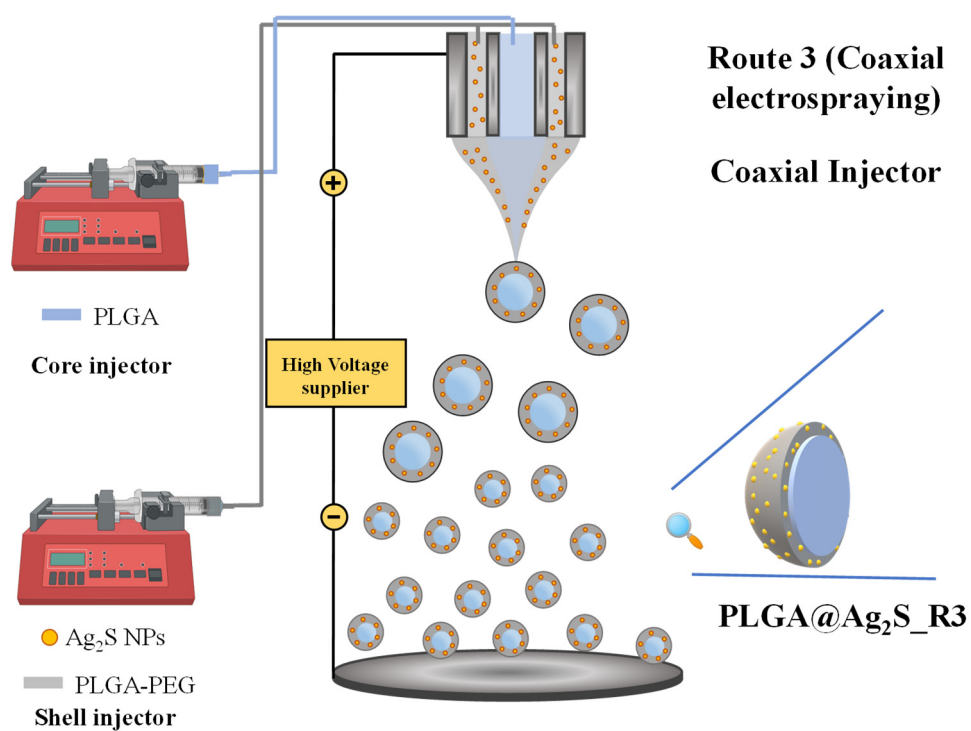

**Scheme S2.** Schematic representation for the synthesis of PLGA@Ag<sub>2</sub>S\_R3 NPs.

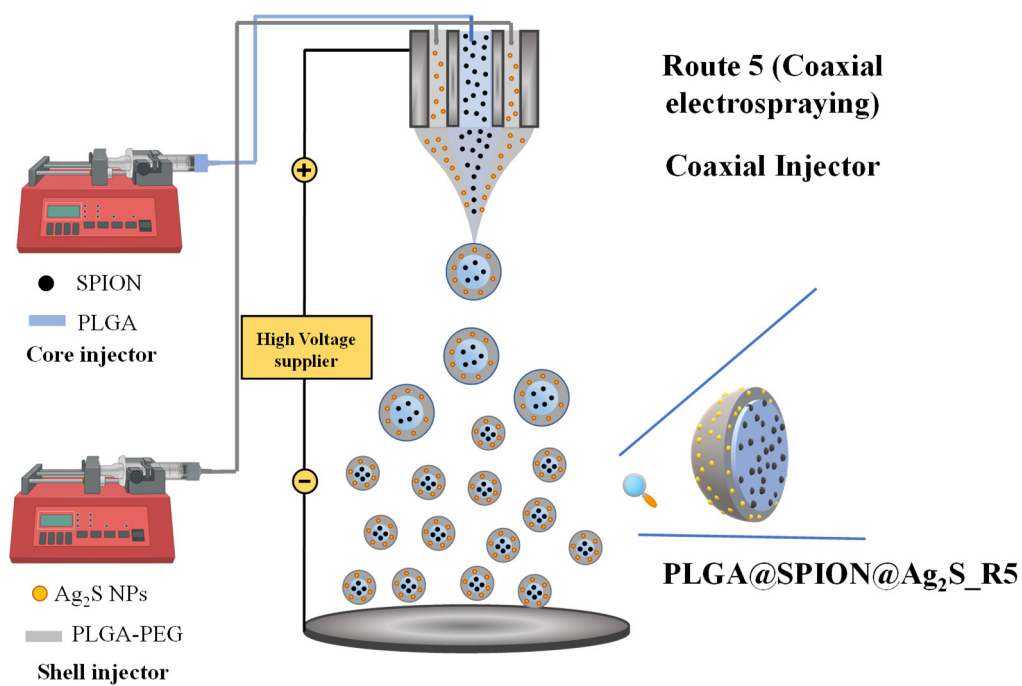

**Scheme S3.** Schematic representation for the synthesis of PLGA@Ag<sub>2</sub>S@SPION\_R5

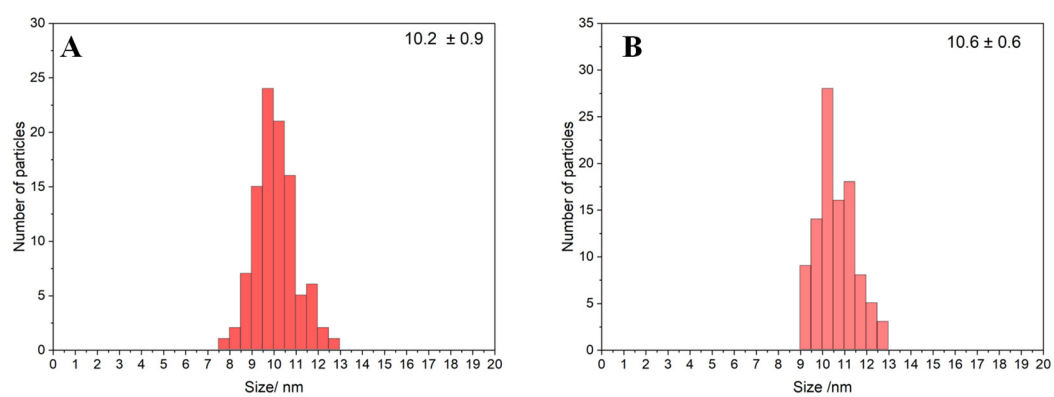

**Figure S1.** Particle size distribution for A)  $\text{Ag}_2\text{S}@DDT$  and B)  $\text{Ag}_2\text{S}@SH\text{-PEG-OCH}_3$  QDs



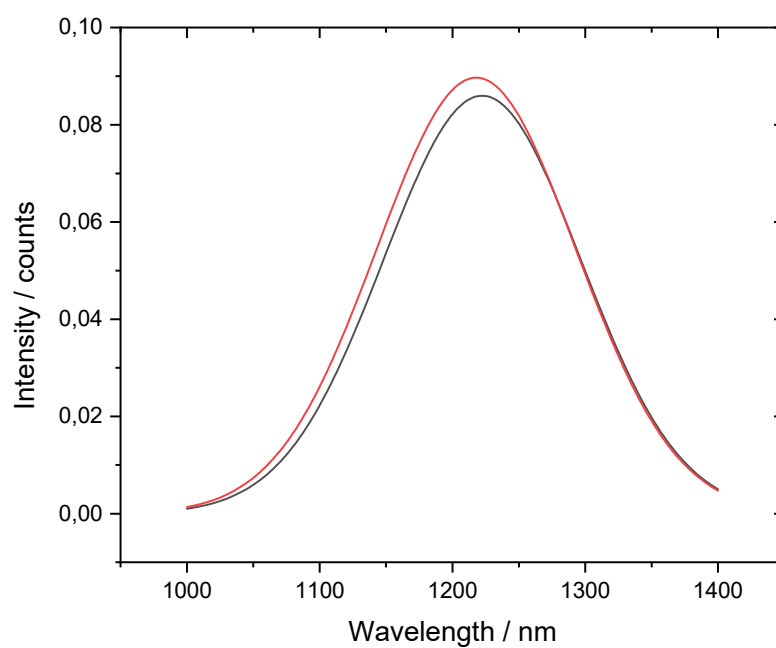

**Figure S2.** Photoluminescence spectra of the Ag<sub>2</sub>S@DDT (black line) and Ag<sub>2</sub>S@SH-PEG-OCH<sub>3</sub> (red line) NPs both in CHCl<sub>3</sub> at a concentration of 1 mg/mL (exc. 800).

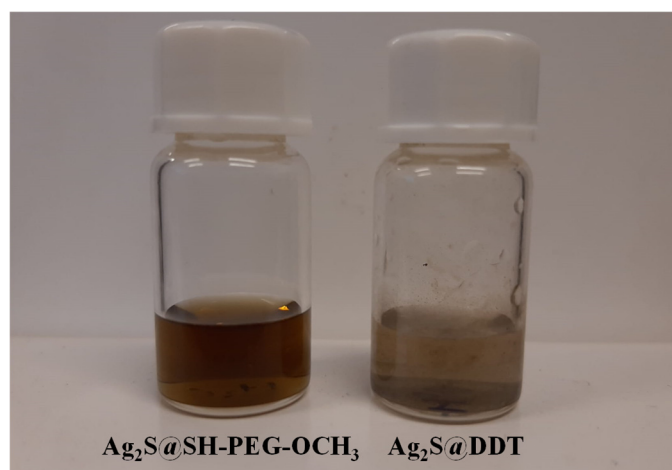

**Figure S3.** Photograph of a aqueous colloidal dispersion for  $\text{Ag}_2\text{S}@DDT$  (right) and  $\text{Ag}_2\text{S}@SH\text{-PEG-OCH}_3$  (left) NPs both in water at a concentration of 1 mg/mL.

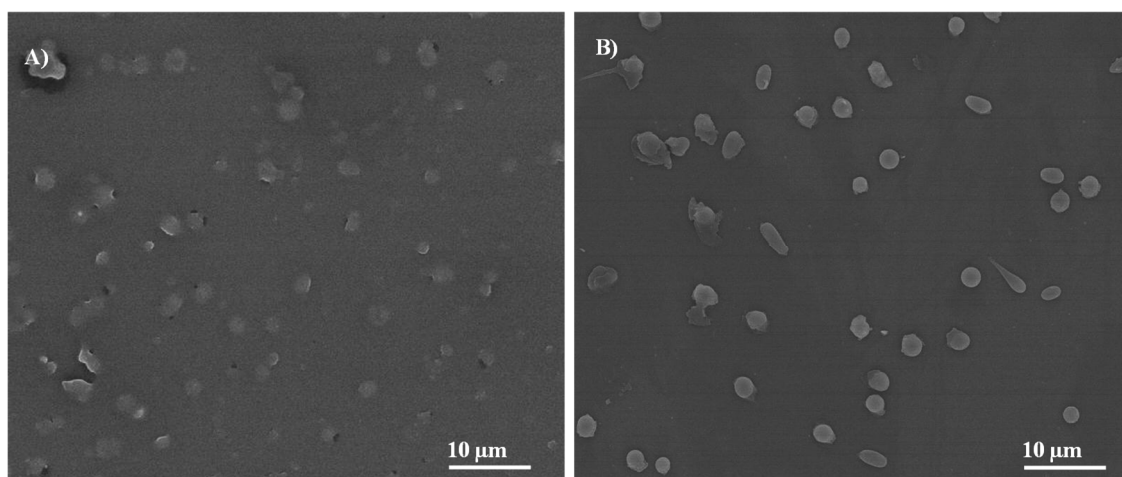

**Figure S4.** Scanning electron microscopy (SEM) images of PLGA@Ag<sub>2</sub>S\_R1 NPs

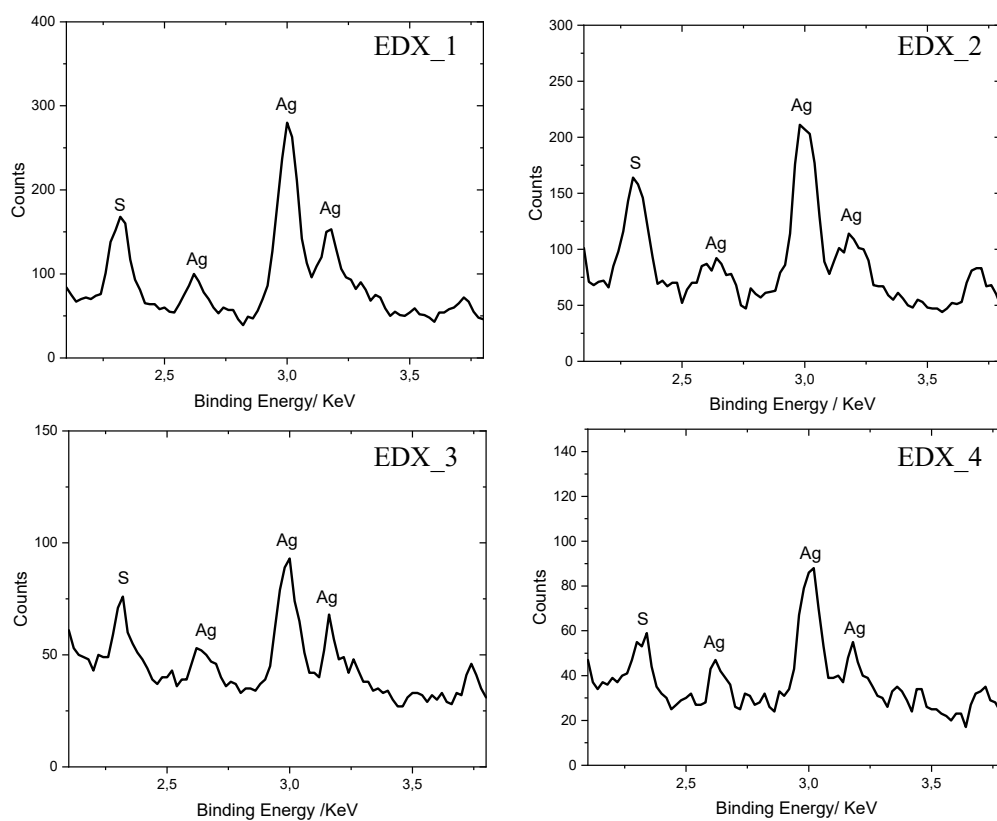

**Figure S5.** Energy-dispersive X-ray spectroscopy spectra of the included PLGA@Ag<sub>2</sub>S NPS showing the Ag and S regions

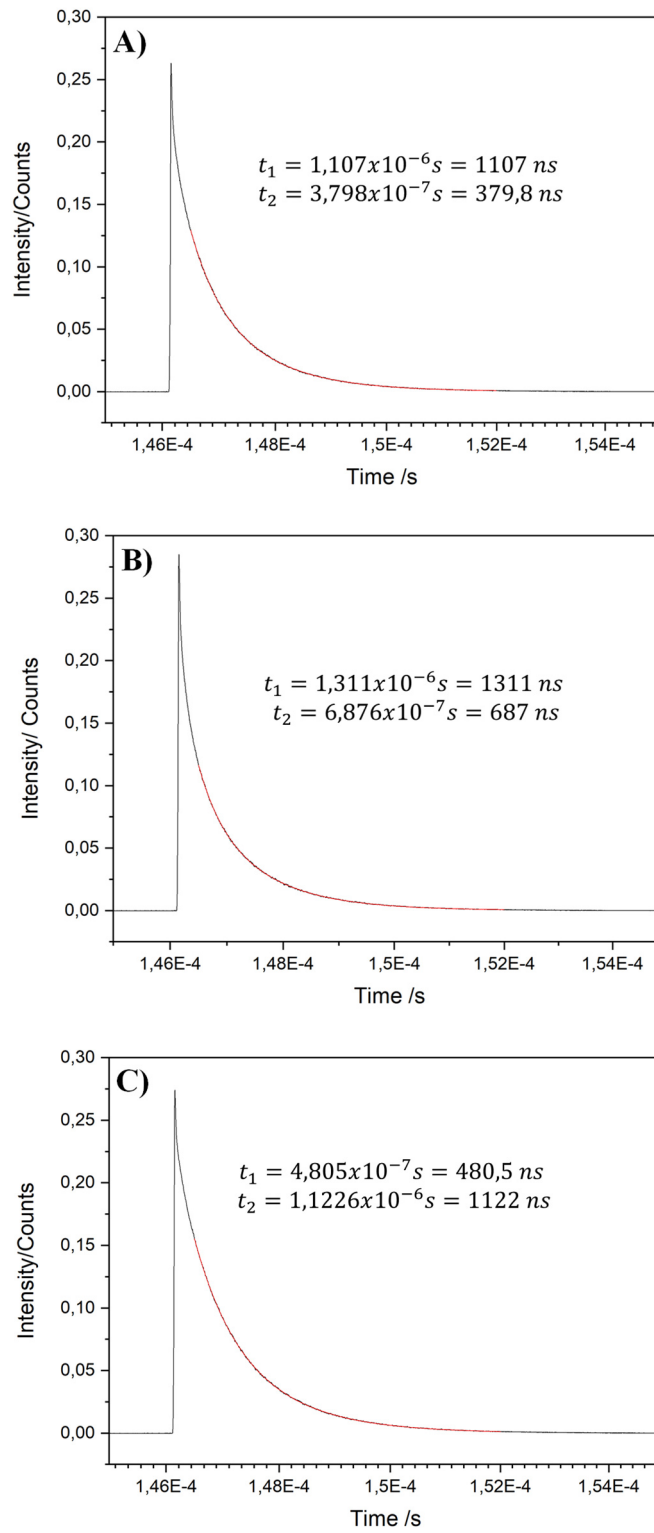

**Figure S6.** Fits for the exponential decay times for A) PLGA@Ag<sub>2</sub>S\_R1 B) PLGA@Ag<sub>2</sub>S\_R2 and C) PLGA@Ag<sub>2</sub>S\_R3 systems.

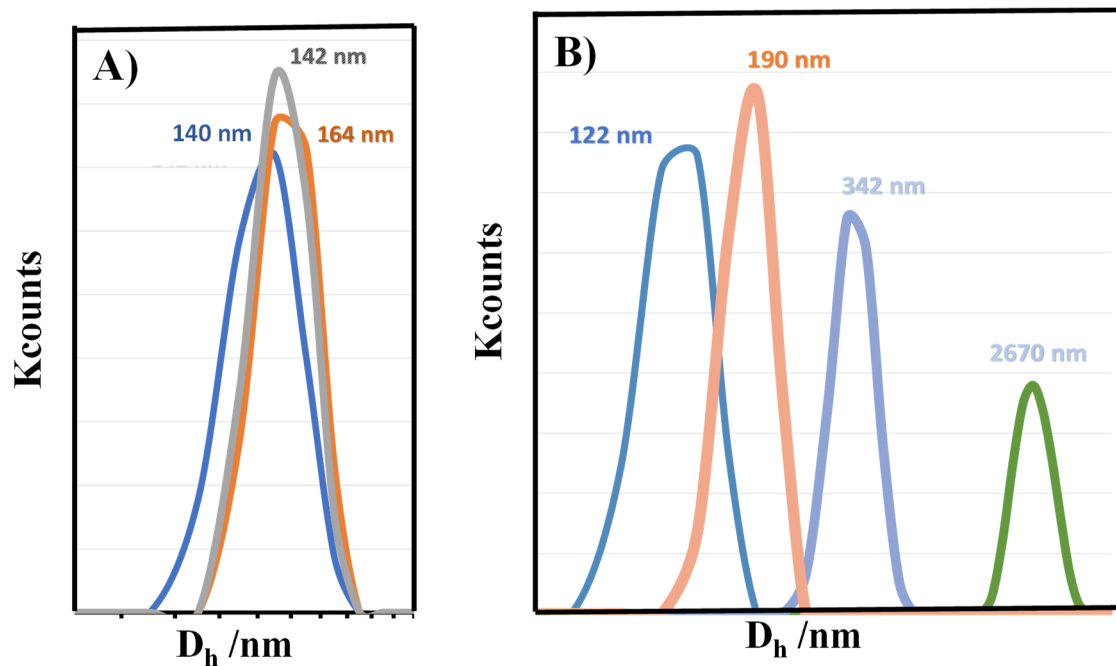

**Figure S7.** Hydrodynamic diameters for PLGA@Ag<sub>2</sub>S\_R1 hybrid systems obtained at different dispersion times A) 0 h (orange), 1 h (gray) and 2 h (blue), and B) 5 h (purple), 8 h (green), 24 h (rose) and 48 h (blue).

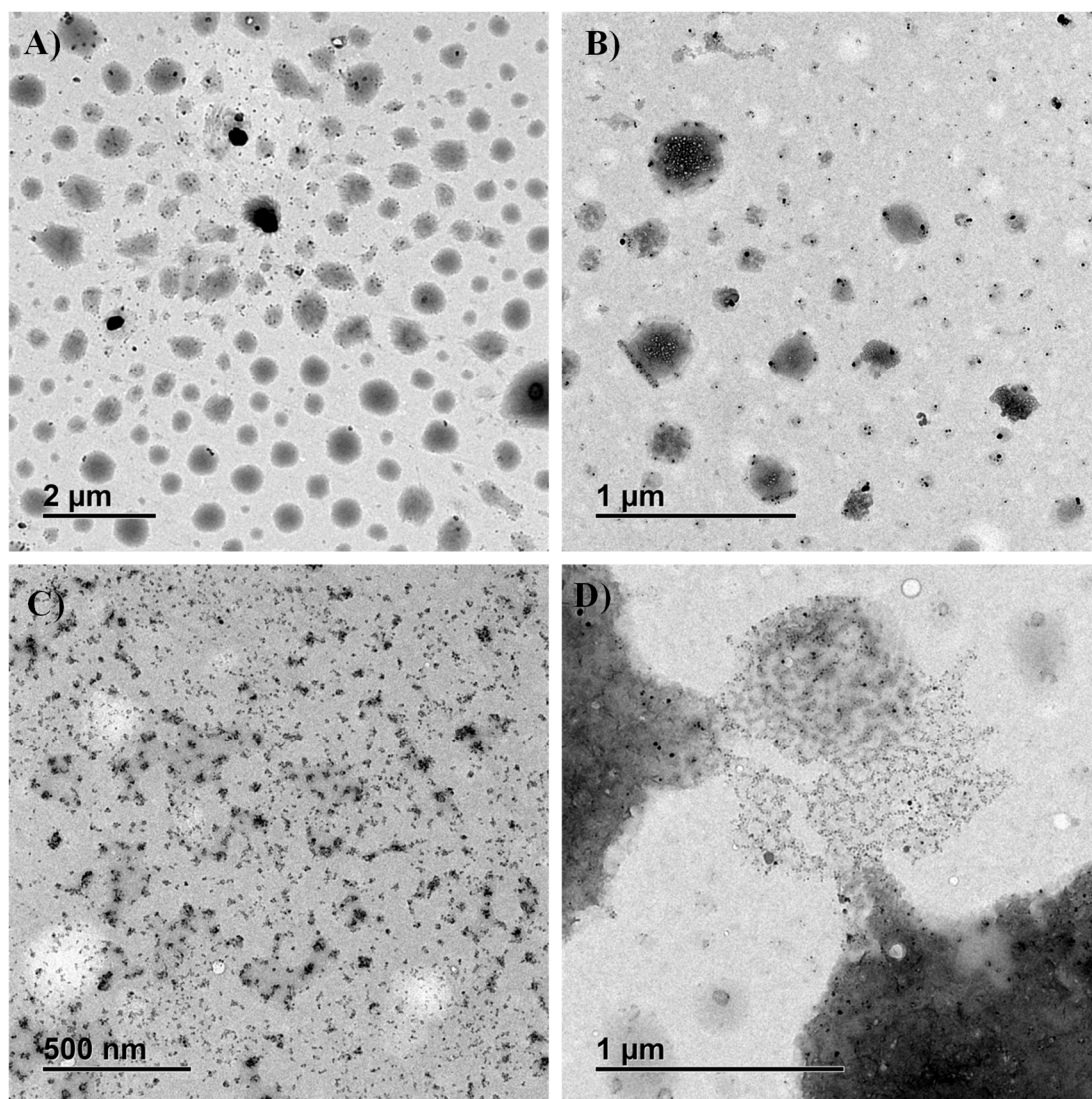

**Figure S8.** TEM images for hybrid PLGA@Ag<sub>2</sub>S\_R2 particles performed at A) 0 h, B) 8 h, C) 24 h and D) 48 h

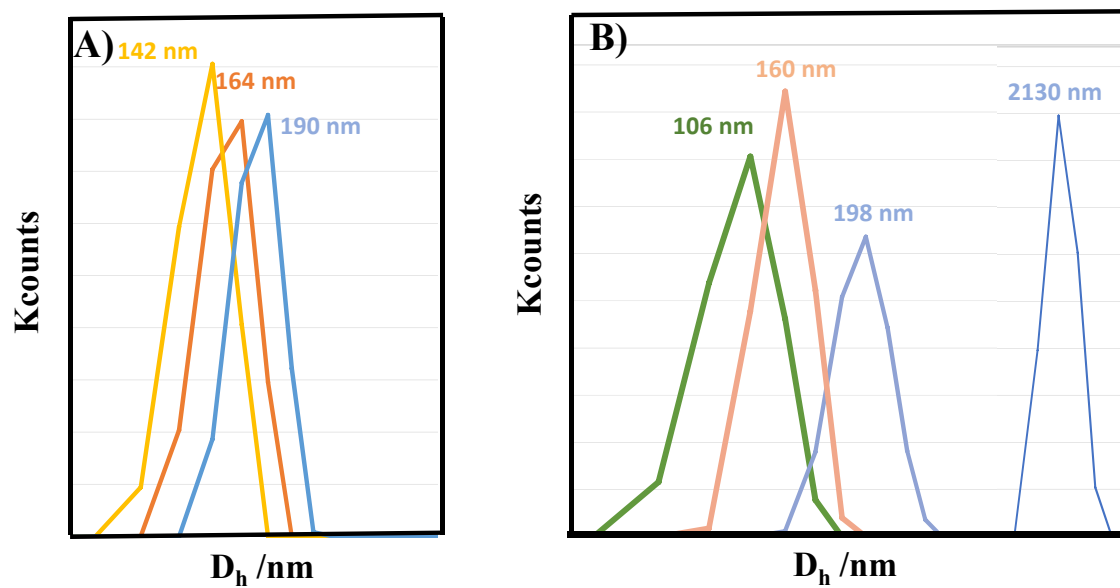

**Figure S9.** Hydrodynamic diameters for PLGA@Ag<sub>2</sub>S\_R2 hybrid systems obtained at different dispersion times A) 0 h (yellow), 1 h (orange) and 2 h (blue), and B) 5 h (purple), 8 h (blue), 24 h (rose) and 48 h (green).



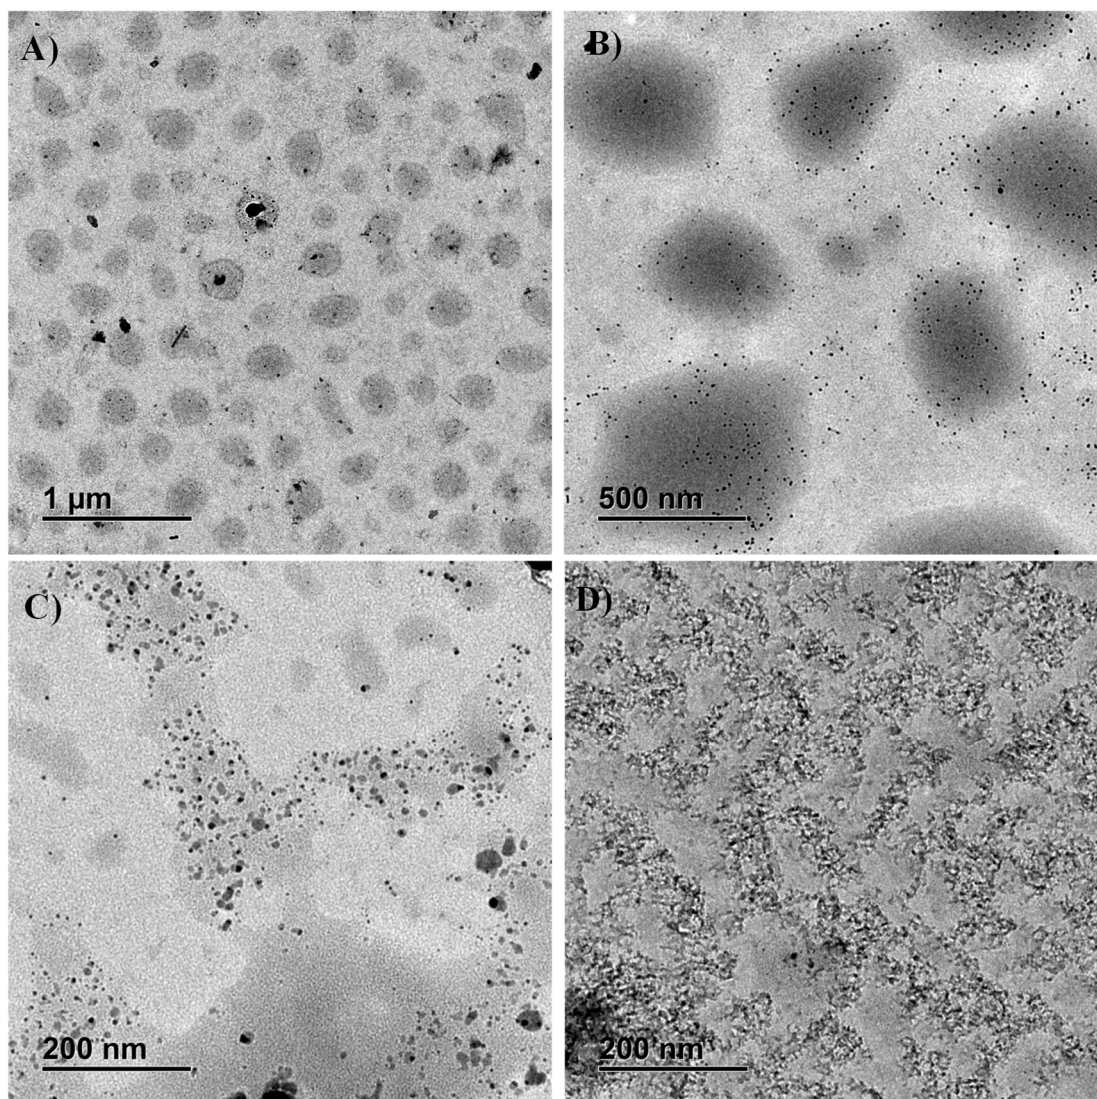

**Figure S10.** TEM images for hybrid PLGA@Ag<sub>2</sub>S\_R3 particles performed at A) 0 h, B) 8 h, C) 24 h and D) 48 h

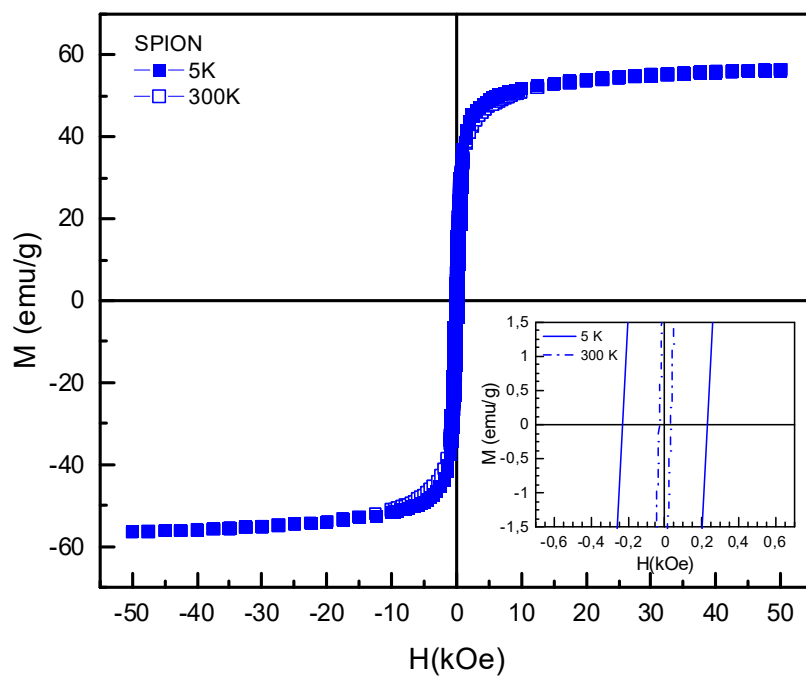

**Figure S11:** Magnetization as a function of the applied field at 5 and 300 K (filled and empty squares respectively) for SPION. Inset represents the low field region to evaluate the coercive fields at 5 and 300 K (straight and dashed lines respectively).

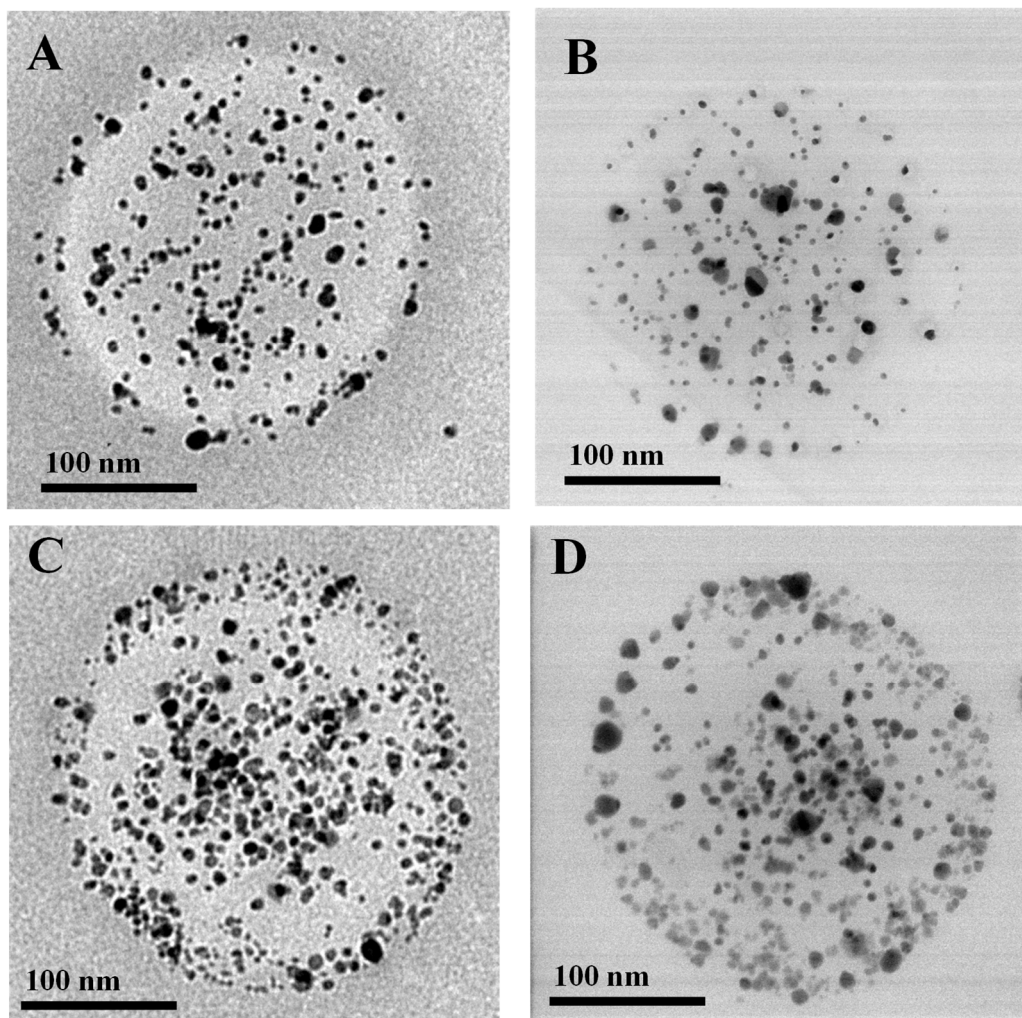

**Figure S12.** Representative TEM images for hybrid PLGA@Ag<sub>2</sub>S@SPION\_R4 particles A) freshly prepared and B) after 6 weeks deposited on the TEM grid. PLGA@SPION@Ag<sub>2</sub>S\_R5 C) freshly prepared P and D) after 6 weeks deposited on the TEM grid.

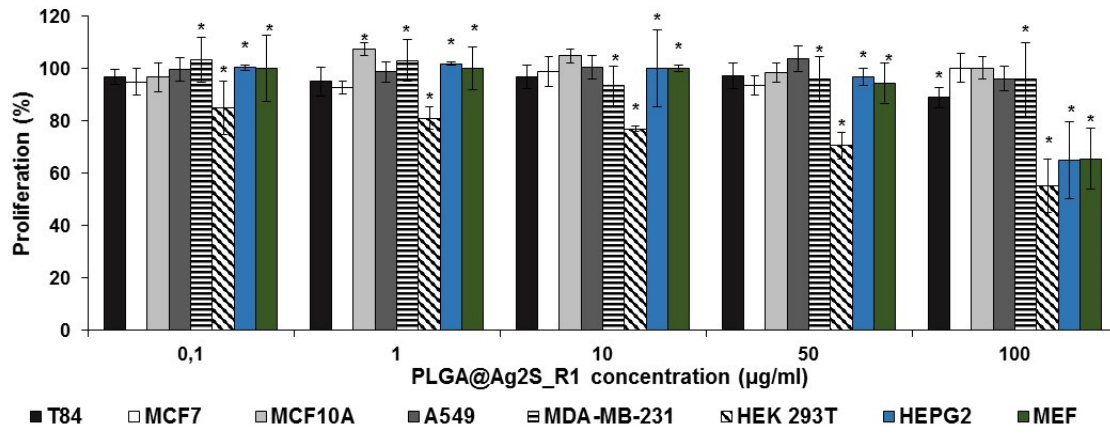

**Figure S13.** Biocompatibility assay of cell lines treated with PLGA@Ag<sub>2</sub>S-R1. The cell lines were exposed to increasing concentrations of PLGA@Ag<sub>2</sub>S-R1 from 0.1 to 100 µg/mL for 72 h. Data represent the mean values  $\pm$  SD of triplicate cultures. Statistically significant differences with respect to untreated control ( $p < 0.05$ ) are represented with one asterisk (\*).

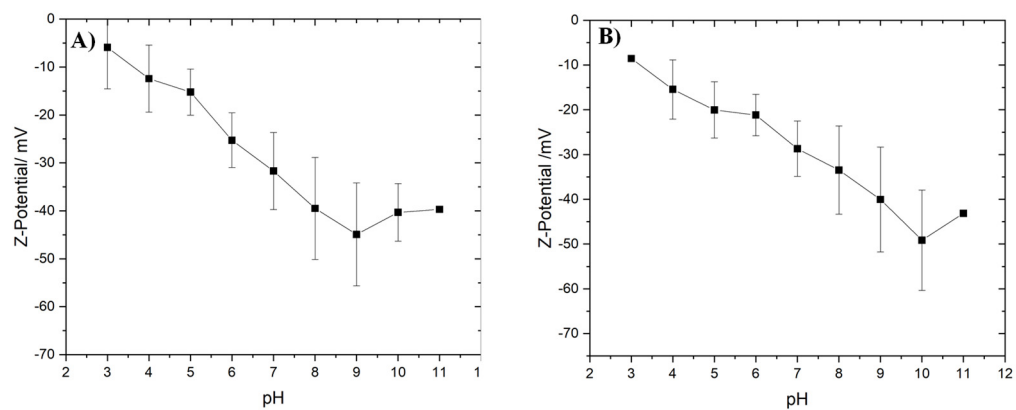

**Figure S14.** Z-Potential values in function of pH for A) PLGA@Ag<sub>2</sub>S\_R1 and B) PLGA@Ag<sub>2</sub>S@maslinic systems.
